# Supplementary material
Source: MDPI journal article supplement (https://www.mdpi.com/2073-4441/11/3/572)
Supplement: s1 [file s1]

Supplementary Material

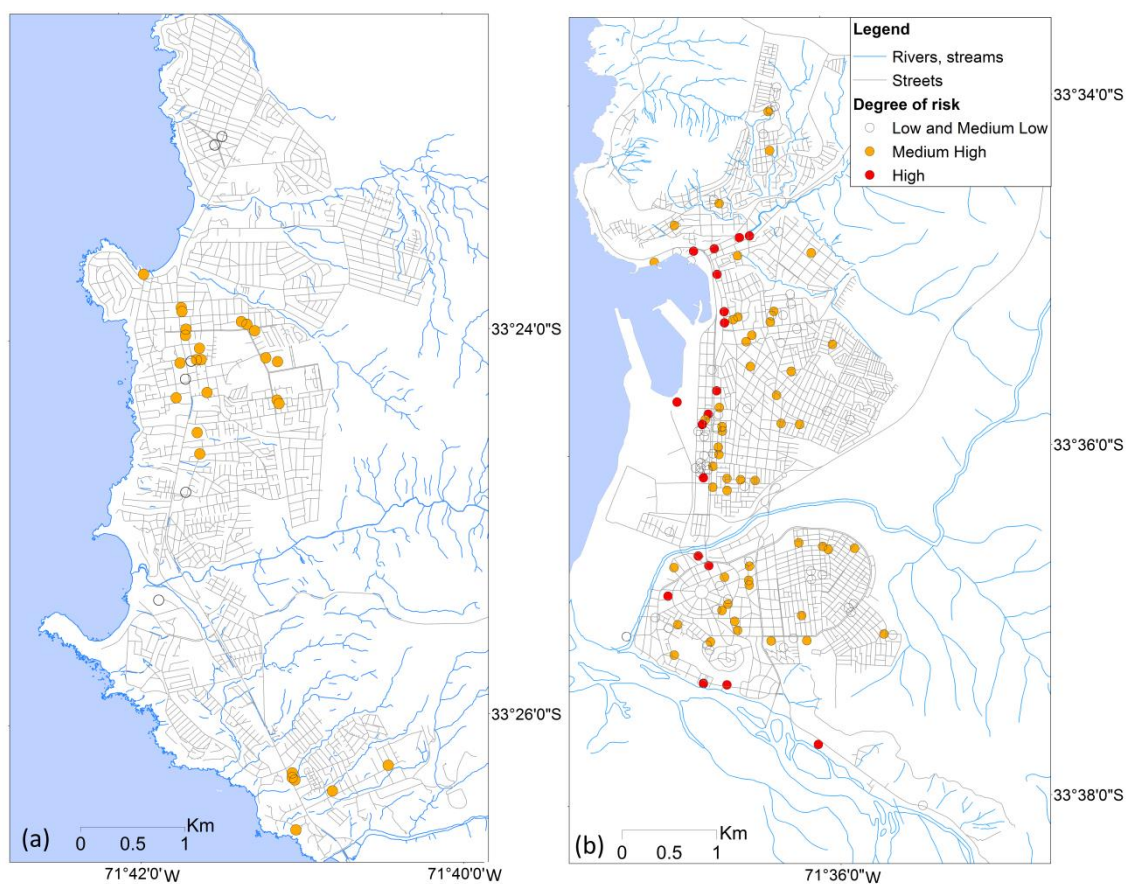

**Figure 1.** Integrated natural disaster risk in facilities at (a) El Quisco and (b) San Antonio.

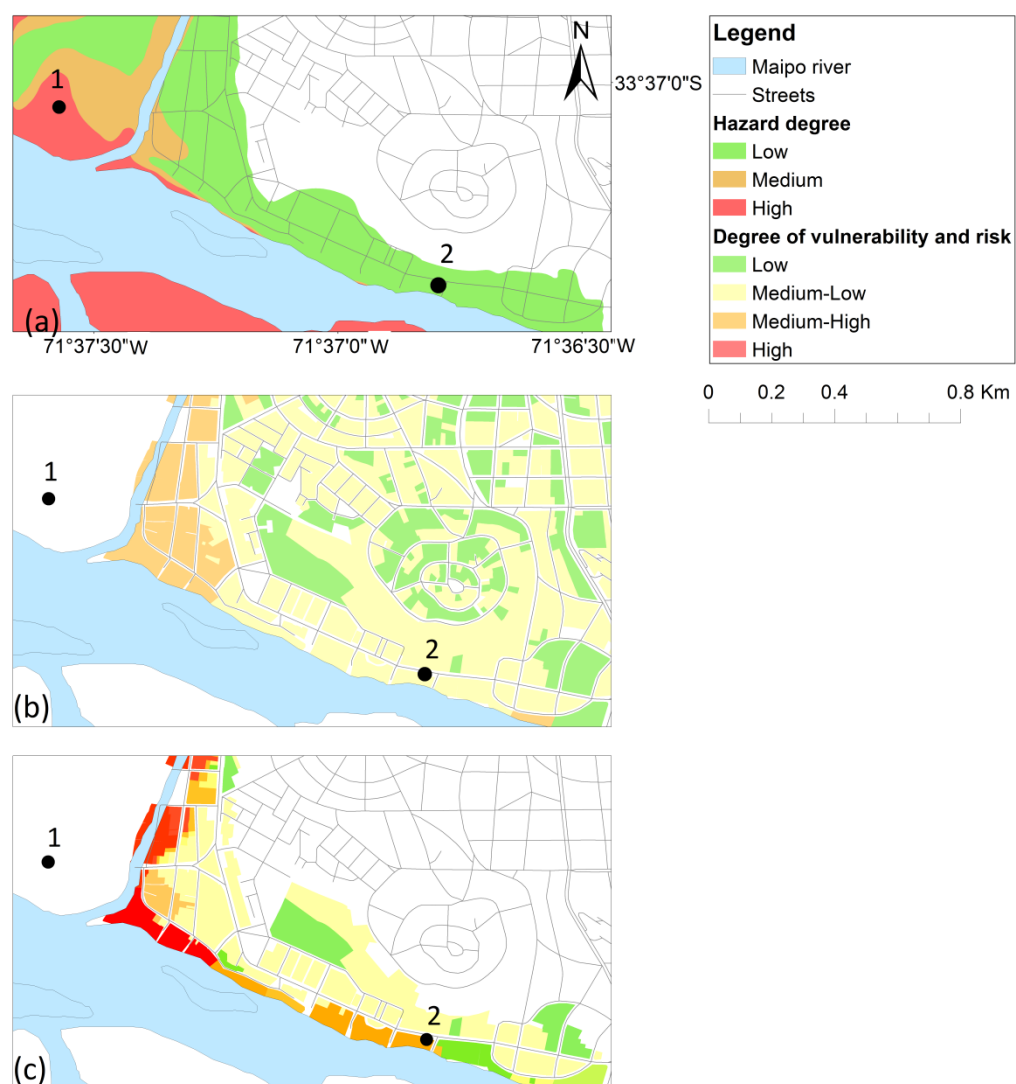

**Figure 2.** (a) Degree of hazard, (b) Vulnerability and (c) Risk evaluation in a highly exposed to tsunami events sector at San Antonio.
